## Chemomechanically voxelated niches for programmable histogenesis

Peter L. H. Newman<sup>\*1</sup>, Pierre Osteil<sup>2,3</sup>, Tim A. Anderson<sup>1</sup>, Jane Q. J. Sun<sup>2,3</sup>, Daryan Kempe<sup>4</sup>, Maté Biro<sup>4</sup>, Jae-Won Shin<sup>5</sup>, Patrick P.L. Tam<sup>2,3</sup>, Hala Zreiqat<sup>\*1</sup>

5 <sup>1</sup> ARC Training Centre for Innovative Bioengineering, The University of Sydney, Sydney, Australia.

<sup>2</sup> Embryology Unit, Children's Medical Research Institute, Sydney, Australia

<sup>3</sup> School of Medical Science, Faculty of Medicine and Health, The University of Sydney

<sup>4</sup> EMBL Australia, Single Molecule Science Node, School of Medical Sciences, UNSW, Sydney, Australia.

10 <sup>5</sup> Department of Pharmacology and Regenerative Medicine; Department of Bioengineering, University of Illinois at Chicago, Illinois, USA.

\*Corresponding authors, Peter Newman: p.newman@sydney.edu.au, Hala Zreiqat: hala.zreiqat@sydney.edu.au

**Tissue and organoid models have been established with increasingly physiological shape, size, and function<sup>1-3</sup>. However, histogenesis proceeds stochastically within these models, relying on 'self-organization' mechanisms that limit their ability to form recapitulative organotypic structures with controlled architecture and composition. To address this, we develop a printing technology to program histogenesis using material-guided instructive cues. We print voxelated niche microenvironments with independently tunable chemical and mechanical microproperties, or 'chemomechanics'. This includes the voxelization of conjugated peptides, proteins, and morphogens across a range of Young's Moduli. We show that these niches are capable of the cellular-scale programming of functions that underpin histogenesis, including mechanosensing and the differentiation of selective cell types. By rationally designing these niches with specific voxelated properties, we can program histogenesis and generate spatially reproducible tissues from a single cell-source. These tissues include a bone-fat-osteoid from stromal mesenchyme and a polarized assembly of germ-layer tissues derived from pluripotent stem cells. While programming germ-layer tissues, we reveal that polarized matrix mechanics can direct human germ-layer histogenesis in a model of tissue development. Thus, chemomechanically voxelated niches are a valuable tool to program and structure cellular-scale behaviors into well-defined tissues. Their continued study potentiates a better understanding of how extrinsic niche factors regulate histogenesis, and their application enhances capabilities for generating tissues and organ systems with a well-defined composition and architecture.**

15  
20  
25  
30

Generating tissue *ex vivo* with biologically relevant architecture and physiologically compatible functions remains a key challenge of tissue engineering. While there has been significant progress generating tissue and organoid models of increasing complexity<sup>1-6</sup>, these approaches use homogeneous extracellular environments, limited to stochastically self-organized tissues absent of

35

the requisite structure for the emergence of higher-level cellular functions. One method to overcome this limitation is to support cells with complex heterogeneous niches with well-defined chemical and mechanical microproperties able to program local cell interactions and assemble these into tissue-typic and organotypic entities. To this end, researchers have developed biomaterials with properties that mimic the mechanics<sup>7-9</sup> and chemistry<sup>10-14</sup> of the cell niche. However, there are no existing technologies to generate synthetic niches that support multilineage tissue constructs with reproducible structure.

One promising technology to generate complex niche materials is 3D-printing. One standard printing method involves the extrusion of a biopolymer ink or the direct extrusion of cells. Extrusion printers can produce materials with discrete properties through the sequential extrusion of different materials, either from separate print cartridges, each loaded with different bioinks<sup>15-19</sup>, or through mixing solutions before their extrusion through a single nozzle<sup>20,21</sup>. Using this approach, researchers have demonstrated the structuring of differing cell types<sup>3,18</sup> mechanical properties<sup>17,21</sup> and biochemicals<sup>22</sup>. Structured materials fabricated with extrusion printing are limited in the number of different material types by the number of print cartridges or their ability to switch and mix solutions within a single print cartridge efficiently. Accordingly, structured cell systems fabricated from extrusion printing have been limited to no more than three cell inks<sup>19,23</sup>, nor been demonstrated with comparable feature sizes to those possible through photolithographic methods<sup>24</sup>. These limitations make the extrusion approach problematic for fabricating niche materials with microscale voxelization. As an alternative approach to indirectly structuring tissues with niche cues, organoid models have been generated using direct extrusion printing of hiPSCs<sup>3,25,26</sup>. iPSCs can be directly extruded into defined architectures and subsequently differentiated via external media-derived cues or intercellular feedback from concurrently patterned differentiated cells. While this approach is permissive to generating macroscale organoids with improved reproducibility, these models still rely on the stochastic self-organization processes limiting their size and preventing the emergence of higher-level function.

Photolithography is an alternative printing method that uses light to selectively polymerize a material from a photoresist. This method offers technical solutions to some of the obstacles faced when extrusion-printing complex materials. For example, photolithographic printing methods have generated materials with nanoscale features of 30 nm<sup>27</sup>, a feat yet to be achieved using extrusion-printing. Early work developing heterogeneous biomaterials with chemically discrete properties used photolithography to pattern regions of small bioactive molecules and peptides<sup>28-30</sup>. However, since then, methods for the discrete spatiotemporal structuring of sensitive and complex biomacromolecules have been developed<sup>31</sup>, as well as methods for printing materials with discrete

mechanical properties<sup>32</sup>. Photolithographic methods print materials with heterogeneous properties by changing the composition of a photoresist during printing. In practice, this is done by serial injection of photoresists with different composition<sup>33</sup>. These photoresists flow through the polymerization volume, which gives this method the name flow lithography (FL). The FL method has been widely used in microfluidics to fabricate microparticles<sup>34</sup>. FL overcomes the technical hurdles of extrusion methods by using separate subsystems for solution injection, mixing, and placement/polymerization. Thus, for FL printing, materials with structured properties can be fabricated with a resolution primarily limited by the focus of light, the so-called 'spot-size'. While previous works using photolithography have generated niches that regulate cell attachment<sup>24,30</sup> and proliferation<sup>31</sup>, the spatial regulation of mechanosensing, cell differentiation, and their assembly into multilineage constructs remain unexplored.

Here we present a printing technology to program histogenesis using chemomechanically voxelated niches. We demonstrate cellular-scale programming of mechanosensing and the differentiation of selective cell types. Niches with specific voxelated properties, can program histogenesis and generate spatially reproducible tissues from a single cell-source, including a bone-fat-osteoid and a niche-polarized germ-layer tissue. While programming germ-layers, we reveal that matrix mechanics can direct human germ-layer histogenesis *in vitro*.

## Results.

**90 Printing of voxelated niches using chemomechanical flow lithography.** Niches were fabricated by flowing photoresists of variable biochemical and polymeric composition through a print chamber during printing (**Fig. 1, Fig. S1,2**). Changing the laser's focus controls the resolution and size of printed structures, with a minimal resolution demonstrated to 7  $\mu\text{m}$  (**Fig. 1b-1, Fig. S3**). The photoresist is composed of an inert hydrogel monomer (polyethylene glycol diacrylate), a photoinitiator (lithium phenyl-2,4,6-trimethylbenzoylphosphinate or LAP<sup>35</sup>), and biochemicals, which can include any peptide, protein, or morphogen with a thiol-functional-group available from cysteine peptide moieties (**Fig. 1c**). Following laser-induced photocleavage of the photoinitiator, the hydrogel monomer polymerizes alongside a thiol-ene bioconjugation reaction that can covalently crosslink biochemicals to the otherwise bioinert niches. Thus, the inclusion of biochemical additives specifies niche bioactivity (**Fig. 1b-5,6, Fig. S4**). Likewise, physiologically stiff (**Fig. 1b-4 Fig. 1f**) and soft (**Fig. 1b-5, Fig. 1g**) Young's moduli can be printed by changing the monomer and photoinitiator concentration. Coordinating the above, CMFL can print 3D architectures that support cell attachment and growth (**Fig. 1 h, i**).

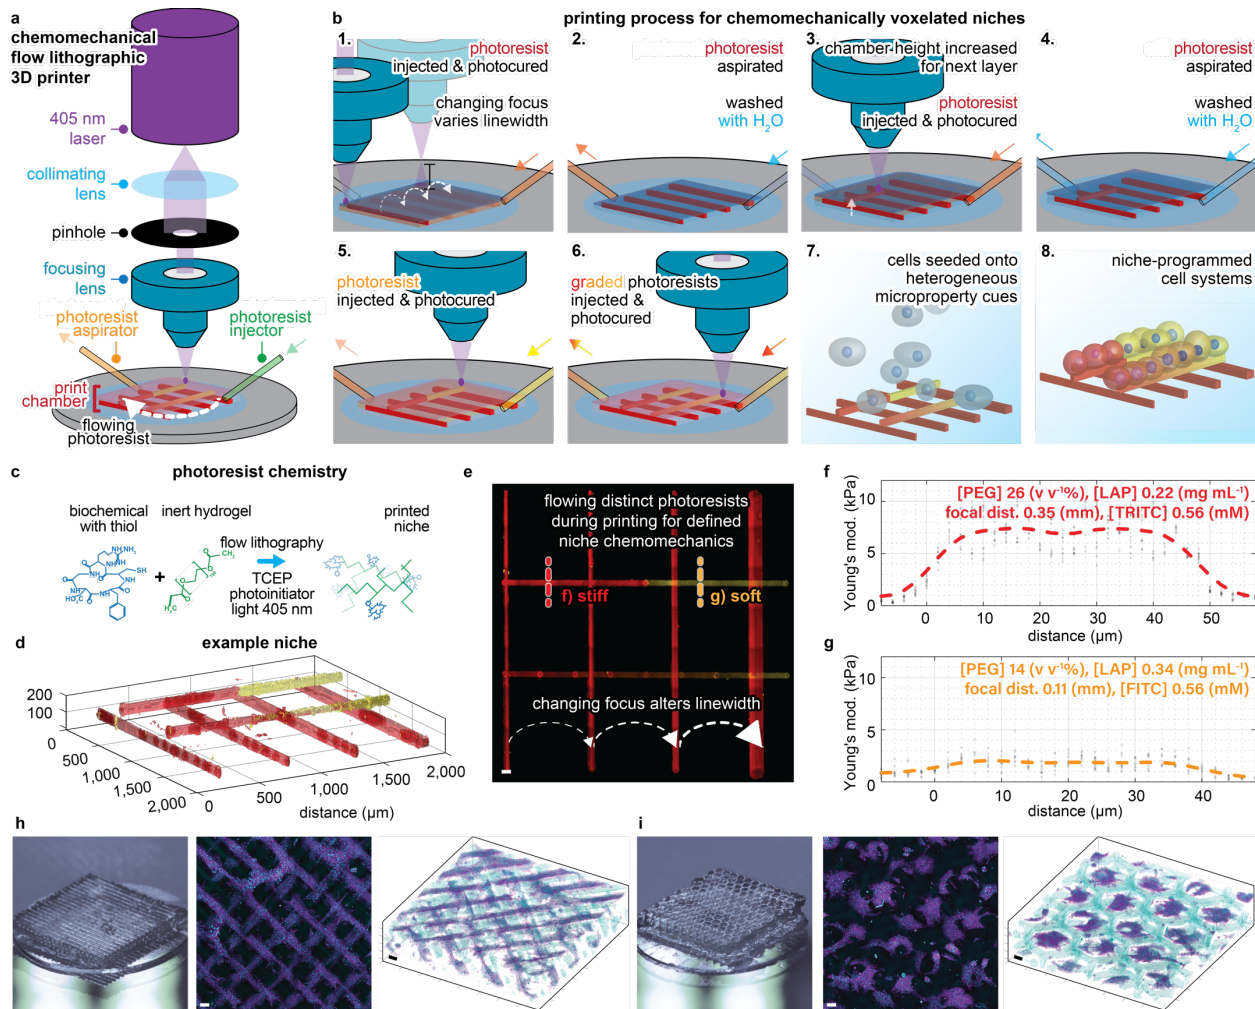

105 **Fig. 1 | Chemomechanical flow lithographic printing of voxelated niches.** **a**, Components of the CMFL 3D-printer. **b**, Stepwise  
 fabrication processes to generate niches. **c**, Photoresist chemistry used. **d**, Confocal image of an example niche with voxelated  
 properties, including changes to linewidth, mechanics (Young's modulus), and chemical microproperties (concentration of the  
 fluorophores FITC and TRITC). **e**, Maximum intensity projection of the 3D niche confocal data, scale bar 50  $\mu\text{m}$ . Dotted red and  
 orange lines annotate the profile of force spectroscopy in **f,g**. Young's modulus across filaments of the pictured niches. Fabrication  
 110 variables are shown at the top of the graphs for physiologically **f** stiff (7.5 kPa, red, TRITC) and **g** soft (2.5 kPa, orange, FITC)  
 segments. Actin (magenta) and hydrogel (cyan) stained ADSCs (primary human adipose-derived stromal cells) cultured over 3D  
 niche scaffolds with **h**, 'stacked-logs' or **i**, 'offset-honeycomb-layers' architecture. Macro lens photography is show beside maximum  
 intensity projections and 3D confocal renders, scale bars 200  $\mu\text{m}$ .

115 To print independently tunable niche chemomechanics, we developed a model that relates the  
 CMFL fabrication variables to the printed linewidth, Young's Modulus, and conjugated thiol-ene  
 biochemical of the printed hydrogels. We characterized six variables affecting niche properties,  
 including three variables controlled by the printer (laser scan velocity, focus, and laser power) and  
 three photoresist variables (the concentration of photoinitiator, monomer, and bioconjugate Biotin-  
 PEG-SH, a model biochemical with free thiol group) (**Fig. 2 a-f**). Decreased light exposure (**Fig.**  
 120 **2a,b**), photoinitiator (**Fig. 2d**), and monomer concentrations (**Fig. 2e**) decreased both Young's  
 modulus and the linewidth of prints, consistent with a lowered rate of polymerization due to the  
 reduced light absorption and consequentially lower photoinitiator cleavage and monomer



conversion (see notes on photopolymerization in the supplementary information, **Fig. S5-6**). The diameter of the conic angle of laser transmittance linearly correlated to changes in linewidth (**Fig. 2c**). Additionally, we characterized the effect of changing Biotin-PEG-SH concentration (a model biochemical with a free thiol group) on niche Young's modulus and linewidth. Here, Biotin-PEG-SH inclusions up to 8 mM did not significantly alter Young's modulus or linewidth (**Fig. 2f**).

A variable state-space that simplifies the number of independent printing variables while still exhibiting physiologically relevant niche properties was characterized (**Fig. 2g-i**). This simplification was achieved by fixing the laser scan velocity to  $100 \text{ mm min}^{-1}$  and laser power to 100%, as well as unified the two variables of photoinitiator and monomer concentration to a single variable by changing the concentration of one as a function of the other (Methods, Equation 2). These simplifications left a state-space with the three independent variables of focus, bioconjugate concentration, and the combined concentration of photoinitiator–monomer. Niches with voxelated microproperties could then be printed by interpolating the relevant fabrication variables from the simplified state-space (**Fig. 2g-i**, see methods for additional details). We demonstrated the power of this approach by printing adjacent niches filament structures with permutations of either increasing or decreasing relative Young's Moduli, linewidth, and relative bioconjugate fluorescence (**Fig. S7**). This approach allows specification of chemomechanically voxelated niches with Young's Moduli between 2-20 kPa, biochemical additives to 4 mM, and with linewidths from 40 to 300  $\mu\text{m}$  (**Fig. 2g-i**).

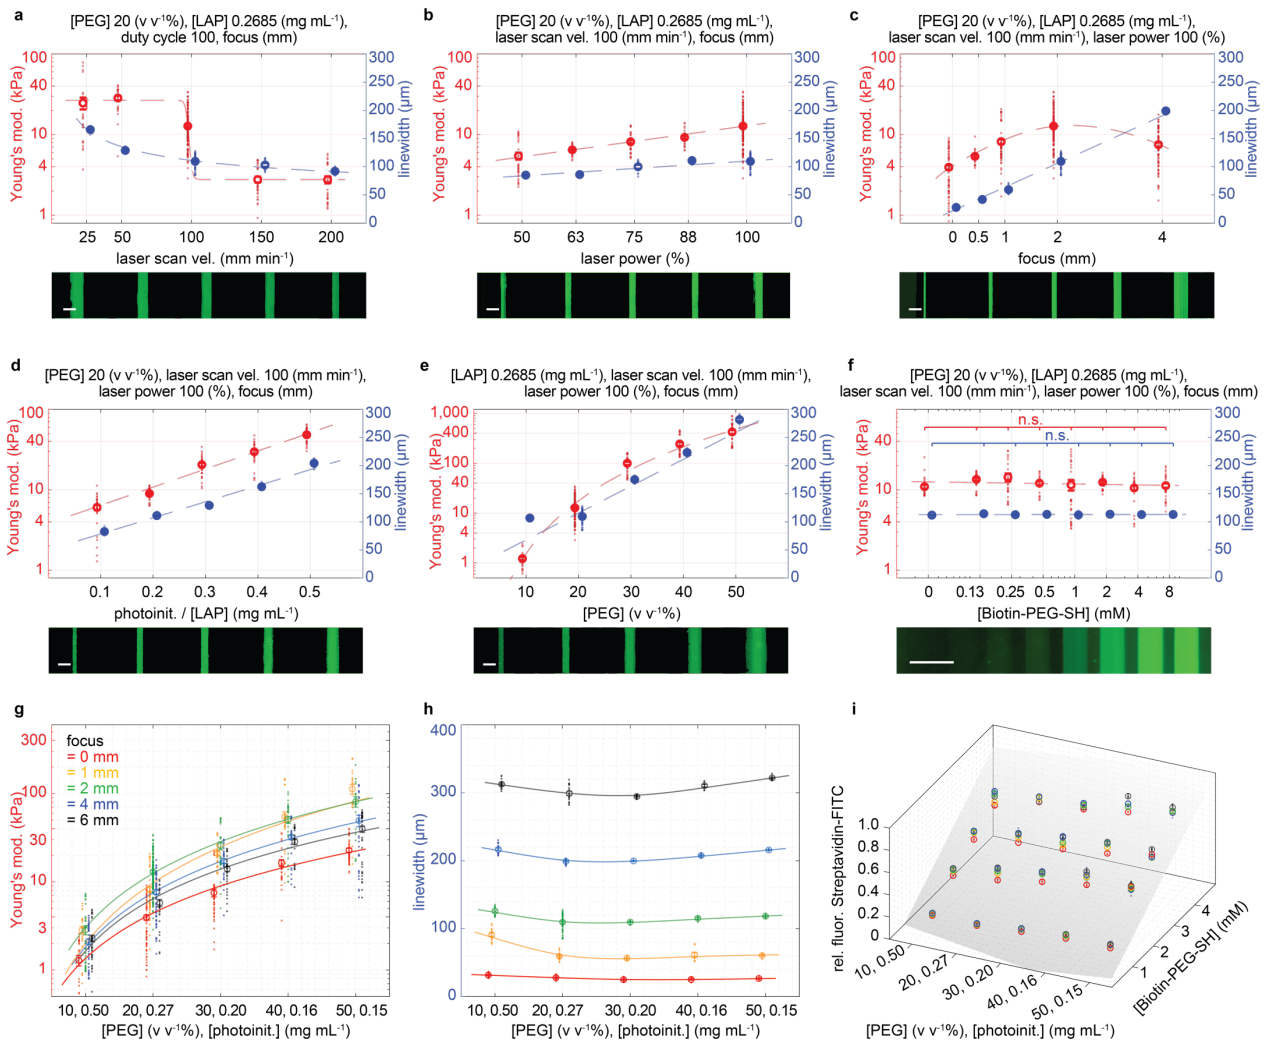

**Fig. 2 | Printing model for voxelated niche chemomechanics.** **a-f** The effect of CMFL device and photoresist variables on niche Young's modulus (left axis, red) and linewidth (right axis, blue). For each variable subset, an image of the printed niche with streptavidin-FITC conjugate is shown. Gamma correction is applied to subset **f** for improved visibility. Fabrication variables that remain constant are enumerated at the top of each subset. Scale bars, 200 μm. **g-i**, The optimized variable state-space. CMFL niches with well-defined properties can be interpolated from the optimized state-space to generate niches with complex microstructure. **g**, The relationship between the unified photoinitiator-monomer concentration (horizontal axis) and focus (shown in different colors) on Young's modulus and **h**, linewidth. **i**, The effect of photoinitiator-monomer (horizontal axis), Biotin-PEG-SH concentration (into-page), and focus (shown in different colors) on the bound thiol-ene conjugate. n.s. –  $p > 0.05$  by one-way ANOVA with Bonferroni post hoc tests. Mean  $\pm$  s.e.m. Throughout the figure, data points and fit lines are offset on the horizontal-axis to minimize overlap of concurrently shown dependent variables.

### Niche-programmed cell attachment, spreading, and mechanosensing.

We explored if voxelated niches could spatially program changes to cellular-scale functions. To test this, we printed niches with parallel filaments between 50–250 μm, with physiologically moderate Young's modulus of 8 kPa<sup>36</sup> and alternating concentrations of the cell attachment peptide RGD. (cyclo(Arg-Gly-Asp-d-Phe-Cys)) (Fig. 3a, Table S1). We then cultured multipotent primary human adipose-derived stromal cells (hADSCs) for 72h on niches. Cells selectively attached to regions printed with the RGD peptide conjugate, increasing cell spreading over structures with larger linewidths.

160 We then explored if niches with voxelated RGD microproperties could regulate cell attachment  
and spreading in a dose-dependent fashion. Accordingly, we printed niches with six voxelated  
regions of RGD concentrations between 0–8 mM, a moderate Young's modulus (8 kPa), and a fixed  
linewidth (250  $\mu$ m) (**Fig. S10, Table S1**). Here we observed cell attachment and spreading reflected  
165 the underlying niche RGD concentration, demonstrating that the niche chemistry can spatially  
define microscale changes to cell attachment and spreading.

This result led us to postulate that voxelated niches could spatially program more complex cell  
functions, including cellular-scale changes to cell mechanosensing. To test this, we studied the  
cellular mechanostat YAP/TAZ, a widely explored marker for determining cellular  
mechanosensing within multipotent stromal cells<sup>14,37–39</sup>. As previously used, we printed niches with  
170 voxelated RGD, as well as niches with voxelated Young's Moduli between 2.5-20 kPa, ranging  
from physiologically soft-to-stiff (**Fig. 3c, Table S1**)<sup>36</sup>. We measured cell mechanosensing by  
quantifying the relative distribution of YAP/TAZ in the nucleus (N) and the cytoplasm (C) by  
assessing the N:C ratio of average fluorescent intensity in these two intracellular compartments.  
The YAP N:C ratio revealed that microscale cell mechanosensing could be regulated through the  
175 underlying chemical and mechanical (RGD, **Fig. 3b**, Young's Moduli, **Fig. 3c**) microproperties of  
niches<sup>37–39</sup>. Therein cell mechanosensing exhibited a sigmoidal response to changes in the  
microstructured concentration of RGD and Young's modulus. A lower threshold of YAP N:C  
correlated with a low concentration of RGD and soft Young's modulus, while for high  
concentrations of RGD and stiff Young's modulus, an upper of YAP N:C was observed. Thus, we  
180 show that voxelated niches can program microscale changes to cell mechanosensing, a finding with  
significant implications for generating tissue *ex vivo*, as YAP signaling plays an essential role  
during development as a critical juncture in Hippo pathway signaling of histogenesis,  
morphogenesis and organ growth<sup>40</sup>.

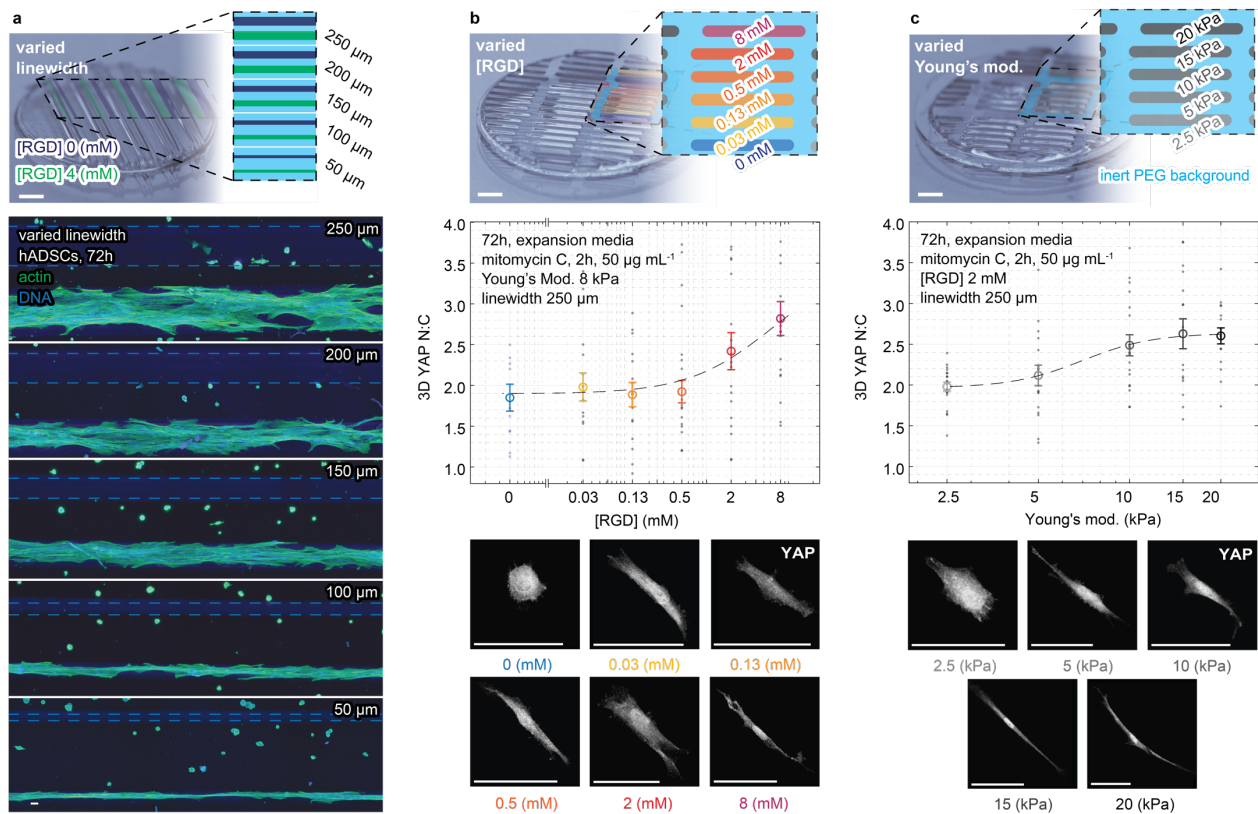

185 **Fig. 3 | Niche-programmed cell attachment, spreading, and mechanosensing.** a, Printed line-pairs with 4 or 0 mM RGD, from  
 50–250  $\mu\text{m}$ , with a fixed Young's modulus of 8 kPa. Representative confocal image shows actin (phalloidin, green) and nucleus  
 (DAPI, blue). Gamma-correction has been applied to improve the visibility of the zero RGD concentration dark blue filaments  
 where no cells attach. Niche arrays with voxelated **b**, chemical (RGD) and **c**, mechanical (Young's modulus) properties are shown  
 190 alongside the quantification and representative MIP images of the 3D confocal nuclear (N) to cytoplasmic (C) ratio of biomolecular  
 mechanostat YAP in hADSCs at 72 h as imaged on their respective microproperty regions. Mean  $\pm$  s.e.m. Scale bars, 50  $\mu\text{m}$ , except  
 macro lens images of CMFL arrays at figure top = 1 mm.

**Niche-programmed histogenesis of a spatially reproducible bone-fat-osteoid from stromal  
 mesenchyme.** Given the upstream role of cellular mechanosensing in cell fate decisions<sup>37</sup>, we  
 tested if cell differentiation could be spatially programmed from chemically (RGD peptide) and  
 195 mechanically (Young's Modulus) voxelated niches. Harnessing the propensity of osteogenic and  
 adipogenic differentiation of the multipotent stromal cells<sup>14,38,41</sup>, we sought to assemble a bone-fat  
 structure resembling an osteon through optimized niche interactions. We assessed osteogenesis by  
 measuring the nucleocytoplasmic (N:C) ratio of RUNX2, an essential transcriptional regulator of  
 early osteogenesis coupled with the commitment of multipotent stromal cells to the osteoblast  
 200 lineage<sup>42</sup>, and by visualizing mineralized bone deposition by Alizarin Red staining. Enhanced  
 osteogenesis, revealed by elevated RUNX2 N:C ratio and enhanced mineralization, was correlated  
 with increasing concentrations of RGD. (**Fig. 4a,b**) and stiffer Young's modulus (**Fig. 4c,d**).  
 Adipogenesis, assessed as the volumetric ratio of fat-to-total-cytoplasmic-volume (**Fig. 4e,f**),  
 was correlated with mechanically soft (Young's modulus) or peptide-enriched (high RGD) regions of  
 8

205 the niches. The highest fat-cytoplasmic volumetric ratio was associated with mechanical microproperties with 8 mM RGD and a low Young's modulus (with ~7-fold increase at 2.5 kPa relative to 20 kPa). Further, we tested niches voxelated with varying concentrations of the morphogen BMP2, known to influence osteogenesis. Niches with varied BMP2 were assayed for osteogenesis, showing that RUNX2 N:C scaled up with BMP2 concentration up to 200 ng mL<sup>-1</sup>,  
210 but decreased at 1000 ng mL<sup>-1</sup>. For Alizarin Red staining, mineralization was shown to increase across all ranges of BMP2, suggesting that high concentrations of BMP2 may have accelerated osteogenesis, passing peak RUNX2 expression at 72 h (**Fig. 4g,h**).

We next sought to assemble multilineage cell differentiation from a single cell source to generate an osteon-like tissue, or 'osteoid' with a well-defined structure. To elicit concurrent cell  
215 differentiation of human adipose-derived stem cells (hADSCs) to both osteo-and-adipogenic lineages, we printed niche arrays with voxelization that reflects the optimal niche microproperties previously explored for osteo-and-adipogenic differentiation (**Fig 4. a-h**). Therein a centralized adipogenic region is surrounded peripherally by an osteogenic region (**Fig. 4i**). hADSCs were seeded over the bone-fat voxelated niche and cultured in a 1:1 adipogenic:osteogenic media for 14  
220 days, displayed concurrent osteogenesis (COL 1A-expressing, **Fig. 4j**) and adipogenesis (high lipid content, **Fig. 4j**) in their respective spatial domains (**Fig. 4k, Fig. S11**). Adipogenesis was localized to the center of the niche, over the region of low stiffness and high RGD, with enhanced osteogenesis over the niche periphery with high stiffness, BMP2, and RGD. This experiment showed that rationally designed voxelated niches can program local cell differentiation to generate  
225 tissue-like multilineage entities with a controlled structure.



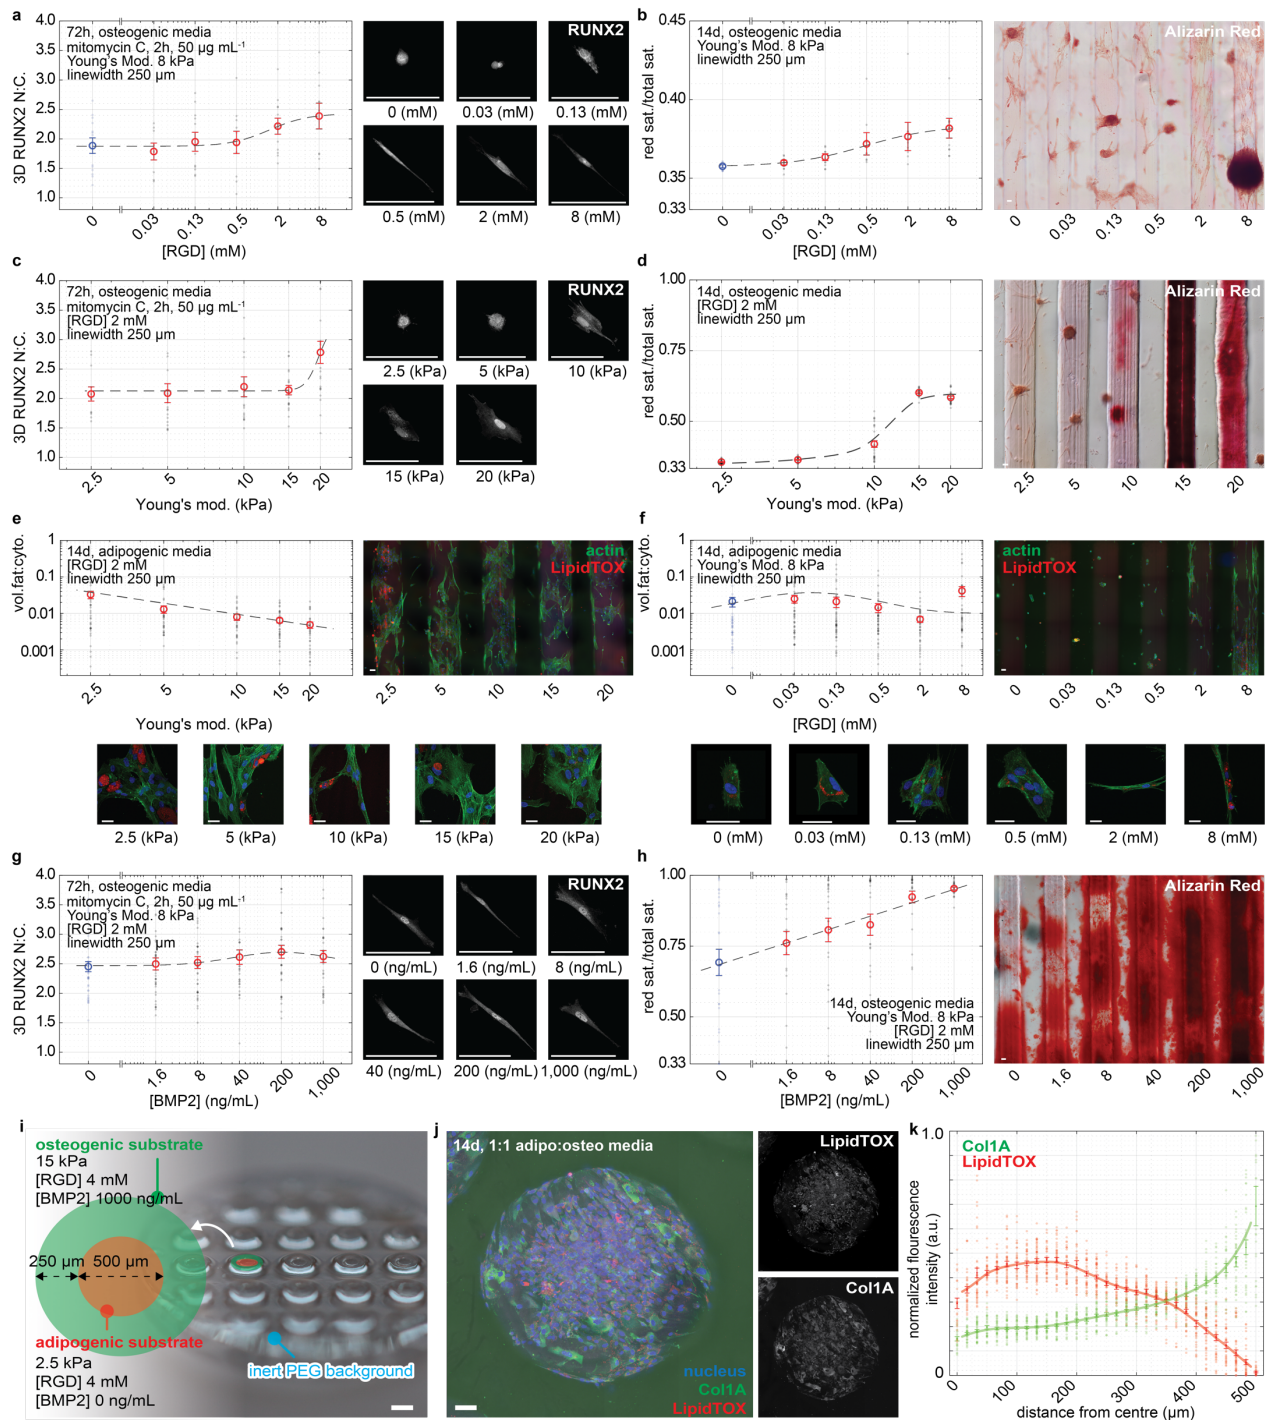

**Fig 4 | Niche-programmed histogenesis of a bone-fat-osteoid from stromal mesenchyme.** **a,b**, Osteogenic differentiation of hADSCs on chemically (RGD) microstructured niches. **a**, Immunofluorescent staining, imaging and quantification of RUNX2 and **b**, quantification and representative widefield images of Alizarin Red stained bone mineralization. **c,d**, Osteogenic differentiation on mechanically (Young's modulus) microstructured niches, with RUNX2 and Alizarin Red stains. **e,f** Adipogenic differentiation over **e**, mechanically (Young's modulus) and **f**, chemically (RGD) microstructured niches, with representative max intensity projections and quantification of LipidTOX stained fat volume per cytoplasmic volume (vol. fat:cyto). **g,h**, Osteogenic differentiation on microstructured concentrations of the bioconjugated morphogen and growth factor BMP2, with RUNX2 and Alizarin Red stains. **i-k**, Organotypic bone-fat microstructures mimic the osteon's architecture with a central adipogenic region and a peripheral osteogenic region. **i**, Printed CMFL bone-fat niche array with optimized microproperties enumerated **j**, Representative max intensity projections of CNA35 fluorescent collagen 1A (Col1A) probe and LipidTOX stained hADSCs. The large inset shows nuclear (blue), brightfield (grey), Col1A (green), and LipidTOX (red) channels, beside smaller grayscale insets showing Col1A and LipidTOX channels, gamma-corrected for ease of visibility. **k**, quantification of the normalized pixel intensity for Col1A and

230

235

240 LipidTOX data across replicates. Scale bars 100  $\mu\text{m}$ , except  $d = 1 \text{ mm}$ . Data presented as mean  $\pm$  s.e.m. throughout. Scale bars 100  $\mu\text{m}$ , except for  $i = 1 \text{ mm}$ .

**Niche-programmed mechanics recapitulate embryonic matrix softening and support polarized germ-layer histogenesis.** We next sought to broaden the application of CMFL and voxelated niches by demonstrating the spatially controlled histogenesis of a pluripotent stem cell derived germ-layer tissue<sup>1,43–46</sup>. To highlight the novelty and utility of these niches, we focused  
245 our research on studying a phenomenon that would otherwise be impossible to explore using alternative tools. We choose to research the role of matrix softening known to drive germ-layer formation and regionalization of tissues in the avian and murine embryos<sup>47,48</sup>. Using voxelated niches, we investigated if a similar process may exist in humans. First, we replicated the patterning of germ layer derivatives in tissue micropatterns *in vitro*, with the culture of hiPSCs plated on 1000  
250  $\mu\text{m}$  circular adhesive templates<sup>46,47</sup>. As per this predicate work, cells cultured on a homogenous template generated radially symmetric germ-layer derivatives (**Fig. S14**). We next modified this method by introducing a 'matrix-softened' region within a voxelated square niche. Such matrix-softened mimetic niches were fabricated with a 1D gradient in their mechanics (**Fig. 5d**) alongside a control niche with uniform niche microproperties (**Fig. 5a**). hiPSCs cultured on both niche types  
255 were induced to differentiate with BMP4 (50 ng/mL) into progenitor cells of the mesoderm (BRA-positive), endoderm (SOX17-positive), and ectoderm (SOX2-positive)<sup>1</sup>. Image analysis pooling replicate-data (**Fig. S12**) revealed that hiPSCs cultured on uniform stiffness substrate displayed regionalization of germ layer tissues from their center-to-periphery (**Fig. 5c,j,i,k**), similar to that observed for circular micropatterns<sup>1</sup> (**Fig. S14**). In contrast, cells cultured over matrix-softened  
260 mimetic niches were able to reconfigure the tissue pattern. Expression of BRA- and SOX17-positive cells were localized to niche regions of low stiffness and SOX2-positive cells to regions with high stiffness (**Fig. 5f,h,l**). This observation reveals a novel role for niche mechanics in cell-fate choices, suggesting that spatial variations in niche mechanics may underpin germ-layer tissue patterning during embryonic development. These findings are consistent with the notion that protease softening of the basement membrane material plays a role in the patterning of tissues in  
265 the embryo's anterior-posterior axis described in murine and avian embryos<sup>47,48</sup>. Thus, CMFL and voxelated niches provide an entry point to better understand the mechanisms underpinning histogenic patterning processes in stem cell-based embryoid models.

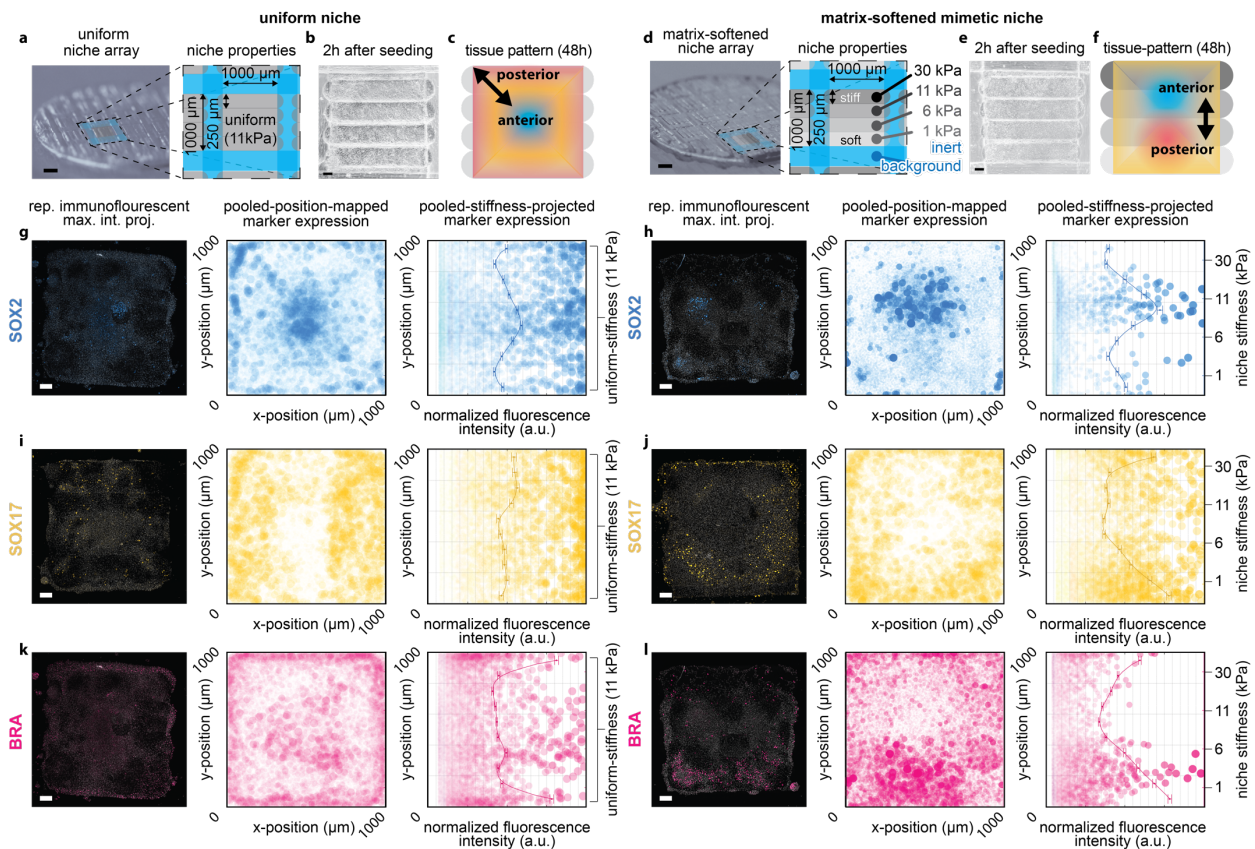

270 **Fig. 5 | Niche-programmed mechanics recapitulate embryonic matrix softening and support polarized germ-layer histogenesis.** **a,d**, Coverslip with niche arrays showing voxelization of niche microproperties. **b,e**, Brightfield imaging at 2 h following attachment. **c,f**, schematic summarizing germ-layer tissue-patterning of embryoid cultures 48h post-BMP4-treatment, showing (ectoderm: SOX2, blue and endoderm: SOX17, yellow; mesoderm: BRA, red). Representative immunofluorescent imaging of tissue cultures on niches with **g,j,k**, uniform-stiffness, or **h,i,l**, matrix-softened mimetic stiffness. Position-mapped expression graphs of replicate pooled-data show each marker to the right of immunofluorescent imaging. Each dot represents a single cell with size and transparency linearly correlated to the marker's normalized fluorescent intensity. The immunostained data in subsets top **g-l** is gamma-corrected to improve visibility. Scale bars 100  $\mu\text{m}$ , except **a,d** = 1 mm.

275

**Discussion.** Chemomechanically voxelated niches offer the ability to program microscale changes to cell functions through independently definable niche interactions. While both 2D and 3D multi-layer hydrogels can be fabricated using the CMFL method (Fig. 1), we validated the technology capacity of niche-programmed cell functions using single-layer (2D) hydrogels. We showed that voxelated niche properties can elicit cell mechanosensing, drive differentiation of stem/progenitor cell tissue, and program histogenesis to generate spatially reproducible multilineage tissue models. Future work using such niches may extend to multi-layer structures with increased complexity. In such work, the fabrication of multi-layer niches could be achieved using chemical photoabsorbers for the facile photolithographic printing of 3D structures<sup>50</sup> or using multiphoton lithography. In particular, as multiphoton photolithography can achieve subdiffraction-limited resolutions<sup>27</sup>, combining multiphoton methods with FL may enable printing materials with voxelated niche nano properties.

290 A further advancement to the CMFL method could be made by adopting a more specific  
conjugation chemistry. In particular, our method is limited when conjugating relatively complex  
macromolecules with numerous cysteine sites. Under these conditions, thiol-ene conjugation  
occurs stochastically and can lead to the bioconjugate's loss of function. This limitation has been  
addressed with more reproducible chemistries, including enzymatic methods<sup>31</sup> and specific high  
295 affinity non-covalent binding chemistries<sup>51</sup>. Further, such complex chemistries have been  
demonstrated with multiphoton photolithographic techniques<sup>24</sup>.

The use of chemomechanically voxelated niches complements recent research in pluripotent stem  
cell biology generating complex tissue and organoid models<sup>2,3</sup>. To date, these methods have relied  
on the self-organization of cells and tissues in relatively homogeneous niches<sup>52</sup>, with  
300 microfluidically introduced morphogen patterning<sup>5</sup>, or the concurrent extrusion printing of  
different cell types<sup>3,18,23</sup>. Complex voxelated niches potentiates the next generation of reproducible  
synthetic tissue models, wherein histogenesis is defined through niche-mediated chemomechanical  
interactions. While it is feasible to reproducibly generate a bone-fat microtissue and polarized  
embryoid, the continued application of these niche systems has the potential to investigate some of  
305 the biggest unanswered questions in biology, such as how complex structure and function emerge;  
how the shape, size, and body coordinates of an organism are determined; and how mechanical and  
positional morphogenetic cues works in concert with morphogens and lineage determinants.

310



## Methods.

**Custom-built CMFL 3D-printer.** The 3D-printer was built modifying a Hyrel System 30M. Custom components were added including, a 405 nm/500 mW laser module and Arduino-based controller electronics, collimating and focusing lens (Thorlabs AL1225H and Olympus x10 Plan  
315 NA 0.3 160/0.17), a pinhole/ring-actuated iris diaphragm (Thorlabs SM1D12D), and hydrophobic print chamber. All custom components of this system are detailed in the supplementary information.

**CMFL niche print chamber.** A photoresist is injected into a glass print chamber with a PDMS coated glass slide top, and acrylate functionalized coverslip base (Fig. S2). The acrylate-modified  
320 glass coverslip base provides a stable surface on which microstructures are covalently attached when printed. Covalent binding between sample and coverslip prevents sample delamination, sample-folding, or strain deformation due to hydrogel swelling. Further, covalent attachment assists sample handling for cell culture and downstream characterization. To acrylate coverslips, a silanization solution was prepared. In a fumehood, a glass dish was filled with methanol (Sigma  
325 322415) and bath sonicated for 5 minutes. The dish was then dried then rinsed a further x2 with methanol. 100 mL of methanol was added to the dish along with 5 mL of glacial acetic acid (Sigma A6283) and 3 mL 3-(trimethoxy silyl) propyl acrylate (TCI A1597). Circular glass coverslips were then washed x3 times in methanol in the glass dish, and a silanization solution was added before covering the dish to prevent evaporation or contamination from ambient H<sub>2</sub>O. Coverslips are left  
330 for one hour for silanization to proceed. Following the reaction, coverslips were rinsed x3 in ethanol, wiped clean, and dried with N<sub>2</sub>. PDMS coating of glass slides was used at the top of the print chamber to prevent the bonding and tearing of photopolymerized niche samples. PDMS (Corning Sylgard 184) is prepared as ten parts base to one part curing agent, mixed, and then centrifuged to remove bubbles. Slides (Sigma CLS294775X50) are coated on Laurell EDC 650  
335 series spin coater. PDMS is poured onto the top of the samples at approximately the volume of an Australian 50 cent piece. The spin coater is then ramped to 1600 rpm for 10 s and stopped. The glass slides are then placed onto a hot plate at 200 °C for 1 min before being transferred to a 37 °C oven overnight.

**Measurement of voxelated niche microproperties.** Niches were fabricated on acrylated  
340 coverslips using the geometries, photoresist, and printer variables as reported. The measurement of Young's modulus was completed via force spectroscopy using a JPK. NanoWizard Sense AFM mounted on Nikon Ti microscope. The device was fitted with the SuperCut quartz cantilever holder for liquid immersion and used with Bruker MLCT pyramidal cantilevers with stiffness calibrated using the thermal noise method. For force-displacement curve generation, hydrogel samples and



345 AFM cantilever were submerged in x1 PBS. The cantilever approach velocity was fixed to  $0.5 \mu\text{m sec}^{-1}$  and terminated at a threshold force of 10 nN. Measurements were taken from 3 independent experimental replicates from at least four different printed-niche-replicates in each experiment. The Young's modulus was calculated from each force-displacement approach curve using a custom fitting program written in MATLAB, with automated contact point determination and fitting for an  
 350  $18^\circ$  half-angle conic section (Sneddon model, as per Bruker recommendation for MLCT pyramidal cantilevers), with sample-thicknesses bottom-effect cone-correction as per Gavara et al.<sup>53</sup>. Data for force spectroscopic curves of AFM tip displacement against indentation force were rejected when discontinuities in the curves were present, corresponding to samples slipping and an inaccurate indentation. For the sample shown in Fig. 1d-g, only two independent experimental replicates were  
 355 fabricated, as this sample only served to illustrate how a chemomechanically voxelated niche material could be fabricated with the CMFL methodology. One replicate was mounted for confocal microscopy (Fig. 1d, e), and the other was analyzed with force spectroscopy (Fig. 1e, f). Microstructured linewidth and bioconjugation were measured using confocal microscopy. Linewidth was directly measure using Fiji-ImageJ across three independent experimental replicates  
 360 with quantification of the concentration of Biotin-PEG-SH was measured indirectly by measuring the relative fluorescence of bound streptavidin-FITC. Indirect measurement was used to prevent the photobleaching or free radical attack of fluorescent molecules during photopolymerization, that otherwise limited interpretation.

**Interpolation method for voxelated niches microproperties.** Empirical data was tabulated pairing dependent and independent variables, including Young's modulus, linewidth, and the  
 365 concentration of bioconjugate (Fig. 2g-i), with the monomer–photoinitiator ("PEG/PI" below), focus (shown as "Z") and [Biotin-PEG-SH]. Using MATLAB (2020a), we then calculated the value of the independent fabrication variables of PEG/PI and Z after substitution of the desired Young's modulus ( $E_{des.}$ ) and linewidth ( $W_{des.}$ ) as per Equation 1 below:

$$370 \quad 0 = \left( \frac{E_{des.} - \frac{\sum(\tau * E_{em.})}{\sum \tau}}{E_{des.}} \right)^2 + \left( \frac{W_{des.} - \frac{\sum(\tau * W_{em.})}{\sum \tau}}{W_{des.}} \right)^2, \text{ where } \tau = \frac{1}{0.1\sqrt{2\pi}} e^{-\frac{1}{2} \left( \frac{\left| \frac{PEG/PI_{em.} - PEG/PI}{40} \right| + \left| \frac{Z_{em.} - Z}{6} \right|}{0.1} \right)^2} \quad \text{Equ. (1)}$$

where,  $PEG/PI_{em.}$  and  $Z_{em.}$  are vectors from the independent paired variables from the tabulated empirical dataset presented in Fig. 2g,h, and are used to calculate the vector  $\tau$  that is substituted into Equ. 1, where a solution is obtained for the dependent paired variables  $E_{em.}, W_{em.}$ . The  
 375 numbers 40 and 6 in Equ. 1 represent the normalization range for PEG/PI and Z respectively, over which data is interpolated. Equ. 1 is solved using the Nelder-Mead simplex method for finding the

minimum of unconstrained multivariable functions. The relationship between *PEG/PI* is calculated as the positive real solution of Equ 2.

$$0 = \left| \left( \frac{PEG/PI-50}{40} \right)^2 + \left( \frac{PI-0.5}{0.35} \right)^2 \right| - 1 \text{ Equ. (2)}$$

380 **Cell culture.** hADSCs (Life Technology) were cultured in expansion media: MesenPRO RST<sup>TM</sup>  
Basal Medium (Invitrogen) with the supplement of 2 mM l-glutamine and MesenPRO RS Growth  
Supplement (Life Technology). hADSCs at passage 3 were used for all the studies. For culture on  
niches, a 10 mm coverslip with printed niche arrays was placed in a 48-well plate. Niche arrays  
were washed twice with PBS before 12 mins UV-light sterilization using a biosafety cabinet. The  
385 medium was changed every 3 days except for studies examining YAP and RUNX2 nuclear  
translocation, where hADSCs were treated with mitomycin (10 µg mL<sup>-1</sup>) (Cayman Chemical,  
11435) for 2 h, to inhibit proliferation, 24 h after seeding, after which media was replaced with  
expansion media. For YAP and RUNX2 translocation studies, cells were seeded at 3,000 cells cm<sup>-2</sup>  
2. For differentiation studies, cells were seeded at 6,000 cells cm<sup>-2</sup>, osteogenic (Gibco, A1007001)  
390 and adipogenic media (Gibco, A1007201) were used as noted. Experiments using iPSCs were  
performed with the CRL2429 C16 hiPSC line, which was derived at the Australian Institute for  
Bioengineering and Nanotechnology (AIBN) at the University of Queensland as previously  
described<sup>54</sup>. For routine passaging, cells were passaged with ReLeSR<sup>TM</sup> and grown on Stem Cell  
Grade Matrigel® (Corning) coated 6-well plate. All experiments used mTeSR<sup>TM</sup> plus, with  
395 supplements as listed. For cell culture of iPSCs on niches, a 10 mm coverslip with printed niche  
arrays was placed in a 48-well plate. The niche arrays were washed twice with PBS before 12 mins  
UV-sterilization using a biosafety cabinet. C16 hiPSC cells were dissociated with Accutase (Gibco)  
and pipetted into a single cell suspension in mTeSR<sup>TM</sup> plus supplemented with 10 µM Rock-  
inhibitor Y27632 (Ri) at 3.3M cells mL<sup>-1</sup> before seeding at 300 µL per well. After 2h, media was  
400 replaced with 10 µM Ri for 10h, before 48h differentiation in 500 µL mTeSR<sup>TM</sup> plus supplemented  
with 50 ng mL<sup>-1</sup> BMP4 (PHC9534 Gibco). For all cell culture experiments, a minimum of 3  
independent experimental replicates was completed for each printed fabrication condition and  
relevant stain. All cells tested negative for mycoplasma contamination. For hADSCs, routine PCR  
assay checks (LookOut® Mycoplasma qPCR Detection Kit, MP0040A-1KT) were completed for  
405 mycoplasma contamination, for hiPSC mycoplasma was tested using the fluorescent kit,  
MycoAlert<sup>TM</sup> Mycoplasma Detection Kit, Catalog #: LT07-318.

**Immunofluorescence, confocal imaging, and image quantification.** For immunostaining, all  
solutions, except for those with dilute antibody and fluorophores, were syringe filtered through  
0.22 µm membrane filters (Merck Millipore SLGP033RS). Cells were fixed at room temperature

410 4% PFA in x1 PBS buffer for 10 mins and then washed three times with PBS, followed by 12 min permeabilization at room temperature with 0.1 w v<sup>-1</sup> % Triton X-100 in PBS. Samples were then incubated in a blocking buffer of 3% BSA, 3.75 mg mL<sup>-1</sup> glycine, and 0.05% w v<sup>-1</sup> Tween 20 in PBS for 1 h at room temperature. Primary antibodies were diluted in 1% BSA and 0.05% w v<sup>-1</sup> Tween 20 in PBS and added overnight at 4°C (anti-YAP (1:250; Santa Cruz sc-101199), anti-  
415 RUNX2-AF488 (1:250; Santa Cruz sc-390351)), or for 2h ( (1:400) SOX2, CST #3579; (1:300) SOX17, R&D systems, AF1924; (1:300) BRA, R&D Systems, AF2085). For indirect immunostaining, samples were washed x3 times with PBS and incubated for 2 h at room temperature with corresponding secondary antibody (YAP with Santa Cruz CFL 488 (1:250, sc-516176), SOX2 with ab150075, SOX17, and BRA with ab150077). Nuclear and actin counterstains  
420 were performed using Abcam iFluor conjugated phalloidin (ab176753, ab176759), and Hoechst 33342 at 0.1 µg mL<sup>-1</sup> (Sigma, 14533) dilute in x1 PBS and incubated for 30 mins at room temperature. Following counterstain incubation, samples were washed an additional x3 with PBS containing 0.05% w v<sup>-1</sup> % sodium azide. All microstructured niche samples were mounted in PMMA blocks with a recessed circular hole to avoid damaging samples (**Fig. S9**). For YAP and  
425 RUNX2 translocation studies, microscopy was completed on a Zeiss LSM 800 Confocal microscope using 63x Objective Plan-Apochromat 63x/1.40NA Oil objective (with an in-plane lateral resolution of 0.413–0.124 µm per pixel) and pinhole diameter of 1.0 AU (50.34 µm) and azimuthal resolution of 0.4 µm. Nuclear images from Hoechst staining were used to create masks that define a nuclear volume. Cytoplasmic masks were defined from flood-filled phalloidin stains,  
430 with the average fluorescent intensity of each volume calculated in MATLAB. Therein, the YAP/RUNX2 nuclear to cytoplasmic translocation ratio was determined as the ratio of the mean YAP/RUNX2 fluorescent saturation intensity of the nuclear volume divided by the fluorescent saturation intensity in the non-nuclear cell cytoplasmic volume. In Fig. 3b,c, 4a,c, YAP/RUNX2 measurements of a total of at least 12 single cells per condition were pooled across 3 independent  
435 experimental replicates from at least 4 printed-niche-replicates. Representative images were selected according to their proximity to the mean data as calculated across all replicates. For imaging hiPSCs over 1 mm square microstructures, we used a 10x Nikon A1R confocal microscope with an in-plane lateral resolution of 0.615 µm per pixel (2048x2048 pixels) and an azimuthal resolution of 2.5–3.3 µm. Using Hoechst nuclear marker, individual cell nuclei were segmented  
440 using Trainable Weka Segmentation, defining three different pixel classes, including nuclear-contours, nuclei, and background. Probability maps were generated and used to identify individual cell nuclei with a loss function that assigns pixels to the final nuclei mask given they: have at least 50% chance of being nuclei and at most a 66% and 75% chance of being a pixel belonging to the  
17

nuclear-contour and background pixel-classes respectively. Using the nuclei masks, the mean  
445 fluorescent intensity of each channel in each nucleus was calculated. Then the coordinates of each  
nucleus within the niches were calculated, allowing replicate data to be remapped to a single plot  
that showed the average position mapped immunostained expression of the 3 germ layer channels  
with marker-size and marker-opacity changing proportionally to the fluorescent intensity of the  
nuclei (see SI for additional details). The expression maps in Fig. 5b,c pool data from 3 independent  
450 experimental replicates, analyzing at least 15 printed-niche-replicates and at least 101,594  
individual cells for each marker.

**LipidTOX, CNA35, and Alizarin Red staining of ADSC differentiation.** We assayed the  
differentiation of hADSCs toward adipogenic and osteogenic lineage in response to niche  
microproperties. All solutions listed below were syringe filtered through 0.22  $\mu\text{m}$  membrane filters  
455 (Merck Millipore SLGP033RS). Alizarin Red (Sigma, A5533) staining was performed to examine  
the presence of mineralized deposits under osteogenic differentiation conditions. Samples were  
washed x2 with PBS before fixation at room temperature in 4% PFA dilute in x1 PBS buffer for  
10 mins and then washed three times with PBS. Samples were then washed x3 in Milli-Q H<sub>2</sub>O  
before incubation with Alizarin Red stain for 5 minutes (9.6 mg mL<sup>-1</sup> Alizarin Red at a pH of 4.2,  
460 adjusted with acetic acid). Following incubation, samples were washed x5 with Milli-Q H<sub>2</sub>O,  
followed by a further x3 washes with x1 PBS containing 0.05 w v<sup>-1</sup> % sodium azide. We examined  
cell mineralization with Alizarin Red staining and widefield Colour microscopy of materials  
following 14 d of culture. Cells were imaged using a Nikon Ni E microscope with color DS-Fi2  
camera and Plan Apo Lambda 10x/0.45NA dry objective. The localization of osteogenesis over  
465 specified RGD and Young's modulus regions was quantified for each niche-replicate sample. The  
mean red saturation was divided by the mean total saturation that combines red, green, and blue  
color components for the corresponding region of interest. For Alizarin Red Stains in Fig. 4 b,d,h,k,  
measurements were pooled across 3 independent experimental replicates from at least 4 printed-  
niche-replicates in each experiment for a total of at least 12 total measurements per niche condition.  
470 Staining with LipidTOX Red Neutral Lipid Stain (Thermo H34476) was completed to quantify cell  
fat volume under adipogenic differentiation conditions. Samples were fixed at room temperature  
4% PFA in x1 PBS buffer at pH 7.4 for 10 mins and then washed three times with PBS, followed  
by 12 min permeabilization at room temperature with 0.1 w v<sup>-1</sup> % Triton X-100 in PBS. Samples  
were then incubated with LipidTOX Red Neutral Lipid Stain (diluted 1:800), Abcam iFluor  
475 conjugated phalloidin (1:200), and Hoechst 33342 at 0.1  $\mu\text{g mL}^{-1}$  (Sigma, 14533) dilute in x1 PBS  
for 30 mins at room temperature. For LipidTOX data in Fig. 4 e,f, measurements were pooled  
across 3 independent experimental replicates from at least 4 printed-niche-replicates in each  
18

experiment for a total of at least 24 fields-of-view per niche condition. In Fig. 4 k, LipidTOX  
measurements were pooled across 3 independent experimental replicates from at least 4 printed-  
480 niche-replicates in each experiment for a total of 12 organotypic bone-fat niches. Following  
incubation, samples were washed an additional x3 with x1 PBS containing 0.05 w v<sup>-1</sup> % sodium  
azide. Fluorescent microscopy of large fields of view (arrays of RGD and Young's modulus) were  
tiled using a Nikon Ni E microscope with a motorized stage and monochrome DS-Qi2 camera and  
Plan Apo Lambda 10x/0.45NA dry objective. Confocal microscopy was completed on a Zeiss LSM  
485 800 Confocal microscope using x63 Objective Plan-Apochromat 63x/1.40NA Oil objective (with  
an in-plane lateral resolution of 0.413  $\mu\text{m}$  per pixel), pinhole diameter of 1.0 AU (50.34  $\mu\text{m}$ ), and  
azimuthal resolution of 0.4  $\mu\text{m}$ . Segmentation was performed using custom MATLAB scripting  
that makes use of the open microscopy Bio-Formats tool. Masks were created to define cytoplasmic  
and fat volumes using phalloidin and LipidTOX stains. For production and purification of the  
490 fluorescent collagen 1A probe, the pET28a-EGFP-CNA35 plasmid was received as a gift from  
Maarten Merckx (Addgene plasmid # 61603; <http://n2t.net/addgene:61603>; RRID:  
Addgene\_61603) and synthesized as reported previously<sup>55</sup>. In brief, protein yields of the CNA35  
probe were synthesized using E.Coli bacteria before purification using ÄKTApurifier (Cytiva) and  
a 5 ml Ni-NTA Superflow Cartridge (Qiagen), dialysis with SnakeSkin<sup>TM</sup> Dialysis tubing with 10  
495 kDa MWCO, and concentration with an Amicon 10 kDa MWCO centrifugal filter unit. For  
imaging, 0.5  $\mu\text{M}$  of EGFP-CNA35 solution were added to the sample and incubated on a plate  
rocker for 15 mins, before washing twice with PBS. In Fig. 4 k, Col1A measurements were pooled  
across 3 independent experimental replicates from at least 4 printed-niche-replicates in each  
experiment for a total of 12 organotypic bone-fat niches.

500

**Acknowledgments.** The authors gratefully acknowledge the Australian Government's financial  
support for providing PLHN an Australian Postgraduate Award Scholarship, the Australian  
Department of Education and Training for awarding PLHN with an Endeavour Fellowship. A  
massive thank you to the discussions and support of Dr. Martin Stewart, Dr. Christina Viray, Dr.  
505 Ashnil Kumar, and H el ene Lebhar from the UNSW Recombinant Products Facility for assistance  
in the production and purification of EGFP-CNA35. From Dr. Courtney Wright as the mensch, and  
the facilities and the scientific and technical aid of Microscopy Australia at the Australian Centre  
for Microscopy & Microanalysis at the University of Sydney, including Dr. Ying Ying Su and Dr.  
Neftali Flores-Rodr iguez. PN thanks Karl Gifford for his assistance with the custom Hyrel System  
510 30 M's modification and operation.



**Author Contributions.** PN conceived of the work, designed the modified CMFL 3D-printer device and method, designed and executed all experimentation, analyzed all data, and wrote the manuscript. PO assisted manuscript preparation, and together with JS, helped the development of methods relating to hiPSCs. DK prepared and provided CNA fluorescent probes and methods relating to their use. MB provided scientific oversight, experimental analysis and assisted with manuscript preparation. PT funded experiments relating to hiPSCs, assisted experimental design and methods on the culture of hiPSCs, provided scientific oversight, and assisted with manuscript preparation. J-WS helped to optimize the methods for the specification of niche mechanics and force spectroscopic methods. HZ funded the project, provided scientific oversight, and assisted with manuscript preparation.

**Sources of research support.** Australian Postgraduate Award Scholarship, Australian Endeavour Award, and Cardiovascular Institute ECR grant (to PLHN.), The Australian National Health and Medical Research Council, National Institutes of Health Grant No. R00-HL125884 (to J-WS). APP1107470 NHMRC Senior Research Fellowship and APP1139515 NHMRC Project grant, and Australian Research Council ITTC IC170100022 (to HZ.)

**Competing Interests statement.** The authors declare no competing interests.

**Code availability statement.** No standalone software or software tools were developed for this work. However, all scripts used for data analysis are available upon request to the corresponding authors.

**Data availability statement.** Datasets supporting the conclusions are shown within the article and its additional files. Data and related scripts with sample data for analysis are available upon request to the corresponding authors.

**References.**

1. Warmflash, A., Sorre, B., Etoc, F., Siggia, E. D. & Brivanlou, A. H. A method to recapitulate early embryonic spatial patterning in human embryonic stem cells. *Nat. Methods* **11**, 847 (2014).
2. Nikolaev, M. *et al.* Homeostatic mini-intestines through scaffold-guided organoid morphogenesis. *Nature* (2020) doi:10.1038/s41586-020-2724-8.

3. Brassard, J. A., Nikolaev, M., Hübscher, T., Hofer, M. & Lutolf, M. P. Recapitulating macro-  
545 scale tissue self-organization through organoid bioprinting. *Nat. Mater.* (2020)  
doi:10.1038/s41563-020-00803-5.
4. Manfrin, A. *et al.* Engineered signaling centers for the spatially controlled patterning of human  
pluripotent stem cells. *Nat. Methods* **16**, 640 (2019).
5. Zheng, Y. *et al.* Controlled modelling of human epiblast and amnion development using stem  
550 cells. *Nature* **573**, 421–425 (2019).
6. Birey, F. *et al.* Assembly of functionally integrated human forebrain spheroids. *Nature* **545**, 54–  
59 (2017).
7. Engler, A. J., Sen, S., Sweeney, H. L. & Discher, D. E. Matrix elasticity directs stem cell lineage  
specification. *Cell* **126**, 677–689 (2006).
- 555 8. Cameron, A. R., Frith, J. E. & Cooper-White, J. J. The influence of substrate creep on  
mesenchymal stem cell behaviour and phenotype. *Biomaterials* **32**, 5979–5993 (2011).
9. Dalby, M. J., Gadegaard, N. & Oreffo, R. O. Harnessing nanotopography and integrin–matrix  
interactions to influence stem cell fate. *Nat. Mater.* **13**, 558–569 (2014).
10. Khetan, S. *et al.* Degradation-mediated cellular traction directs stem cell fate in covalently  
560 crosslinked three-dimensional hydrogels. *Nat. Mater.* **12**, 458 (2013).
11. Hosaka, S., Ozawa, H. & Tanzawa, H. Controlled release of drugs from hydrogel matrices.  
*J. Appl. Polym. Sci.* **23**, 2089–2098 (1979).
12. Edelman, E. R., Mathiowitz, E., Langer, R. & Klagsbrun, M. Controlled and modulated  
release of basic fibroblast growth factor. *Biomaterials* **12**, 619–626 (1991).
- 565 13. Burdick, J. A. & Anseth, K. S. Photoencapsulation of osteoblasts in injectable RGD-modified  
PEG hydrogels for bone tissue engineering. *Biomaterials* **23**, 4315–4323 (2002).
14. Cosgrove, B. D. *et al.* N-cadherin adhesive interactions modulate matrix mechanosensing  
and fate commitment of mesenchymal stem cells. *Nat. Mater.* **15**, 1297 (2016).
15. Miller, J. S. *et al.* Rapid casting of patterned vascular networks for perfusable engineered  
570 three-dimensional tissues. *Nat. Mater.* **11**, 768–774 (2012).
16. Xu, T. *et al.* Complex heterogeneous tissue constructs containing multiple cell types prepared  
by inkjet printing technology. *Biomaterials* **34**, 130–139 (2013).
17. Hockaday, L. *et al.* Rapid 3D printing of anatomically accurate and mechanically  
heterogeneous aortic valve hydrogel scaffolds. *Biofabrication* **4**, 035005 (2012).
- 575 18. Kolesky, D. B., Homan, K. A., Skylar-Scott, M. A. & Lewis, J. A. Three-dimensional  
bioprinting of thick vascularized tissues. *Proc. Natl. Acad. Sci.* **113**, 3179–3184 (2016).

19. Kang, H.-W. *et al.* A 3D bioprinting system to produce human-scale tissue constructs with structural integrity. *Nat. Biotechnol.* **34**, 312–319 (2016).
20. Ober, T. J., Foresti, D. & Lewis, J. A. Active mixing of complex fluids at the microscale. *Proc. Natl. Acad. Sci.* **112**, 12293–12298 (2015).
21. Skylar-Scott, M. A., Mueller, J., Visser, C. W. & Lewis, J. A. Voxelated soft matter via multimaterial multinozzle 3D printing. *Nature* **575**, 330–335 (2019).
22. Lee, A. *et al.* 3D bioprinting of collagen to rebuild components of the human heart. *Science* **365**, 482 (2019).
23. Kolesky, D. B. *et al.* 3D bioprinting of vascularized, heterogeneous cell-laden tissue constructs. *Adv. Mater.* **26**, 3124–3130 (2014).
24. Richter, B. *et al.* Guiding cell attachment in 3D microscaffolds selectively functionalized with two distinct adhesion proteins. *Adv. Mater.* **29**, 1604342 (2017).
25. Ma, X. *et al.* Deterministically patterned biomimetic human iPSC-derived hepatic model via rapid 3D bioprinting. *Proc. Natl. Acad. Sci.* **113**, 2206–2211 (2016).
26. Lawlor, K. T. *et al.* Cellular extrusion bioprinting improves kidney organoid reproducibility and conformation. *Nat. Mater.* 1–12 (2020).
27. Müller, P. *et al.* STED-Inspired Laser Lithography Based on Photoswitchable Spirothiopyran Moieties. *Chem. Mater.* **31**, 1966–1972 (2019).
28. Chen, C. S., Mrksich, M., Huang, S., Whitesides, G. M. & Ingber, D. E. Geometric control of cell life and death. *Science* **276**, 1425–1428 (1997).
29. Mosiewicz, K. A. *et al.* In situ cell manipulation through enzymatic hydrogel photopatterning. *Nat. Mater.* **12**, 1072 (2013).
30. Luo, Y. & Shoichet, M. S. A photolabile hydrogel for guided three-dimensional cell growth and migration. *Nat. Mater.* **3**, 249 (2004).
31. Shadish, J. A., Benuska, G. M. & DeForest, C. A. Bioactive site-specifically modified proteins for 4D patterning of gel biomaterials. *Nat. Mater.* 1 (2019).
32. Yin, H., Ding, Y., Zhai, Y., Tan, W. & Yin, X. Orthogonal programming of heterogeneous micro-mechano-environments and geometries in three-dimensional bio-stereolithography. *Nat. Commun.* **9**, 4096 (2018).
33. Mayer, F. *et al.* Multimaterial 3D laser microprinting using an integrated microfluidic system. *Sci. Adv.* **5**, eaau9160 (2019).
34. Dendukuri, D., Pregibon, D. C., Collins, J., Hatton, T. A. & Doyle, P. S. Continuous-flow lithography for high-throughput microparticle synthesis. *Nat. Mater.* **5**, 365 (2006).

- 610 35. Fairbanks, B. D., Schwartz, M. P., Bowman, C. N. & Anseth, K. S. Photoinitiated polymerization of PEG-diacrylate with lithium phenyl-2, 4, 6-trimethylbenzoylphosphinate: polymerization rate and cytocompatibility. *Biomaterials* **30**, 6702–6707 (2009).
36. Guimarães, C. F., Gasperini, L., Marques, A. P. & Reis, R. L. The stiffness of living tissues and its implications for tissue engineering. *Nat. Rev. Mater.* 1–20 (2020).
- 615 37. Dupont, S. *et al.* Role of YAP/TAZ in mechanotransduction. *Nature* **474**, 179–183 (2011).
38. Yang, C., Tibbitt, M. W., Basta, L. & Anseth, K. S. Mechanical memory and dosing influence stem cell fate. *Nat. Mater.* **13**, 645–652 (2014).
39. Caliari, S. R., Vega, S. L., Kwon, M., Soulas, E. M. & Burdick, J. A. Dimensionality and spreading influence MSC YAP/TAZ signaling in hydrogel environments. *Biomaterials* **103**, 314–
- 620 323 (2016).
40. Meng, Z., Moroishi, T. & Guan, K.-L. Mechanisms of Hippo pathway regulation. *Genes Dev.* **30**, 1–17 (2016).
41. Chaudhuri, O. *et al.* Hydrogels with tunable stress relaxation regulate stem cell fate and activity. *Nat. Mater.* **15**, 326–334 (2016).
- 625 42. Komori, T. Regulation of bone development and extracellular matrix protein genes by RUNX2. *Cell Tissue Res.* **339**, 189 (2010).
43. Muncie, J. M., Ayad, N. M., Lakins, J. N. & Weaver, V. M. Mechanics regulate human embryonic stem cell self-organization to specify mesoderm. *Dev.-CELL--20-00131* (2020).
44. Tewary, M. *et al.* A stepwise model of reaction-diffusion and positional information governs
- 630 self-organized human peri-gastrulation-like patterning. *Development* **144**, 4298–4312 (2017).
45. Xue, X. *et al.* Mechanics-guided embryonic patterning of neuroectoderm tissue from human pluripotent stem cells. *Nat. Mater.* **17**, 633–641 (2018).
46. Fu, J., Warmflash, A. & Lutolf, M. P. Stem-cell-based embryo models for fundamental research and translation. *Nat. Mater.* 1–13 (2020).
- 635 47. Nakaya, Y., Sukowati, E. W., Wu, Y. & Sheng, G. RhoA and microtubule dynamics control cell–basement membrane interaction in EMT during gastrulation. *Nat. Cell Biol.* **10**, 765–775 (2008).
48. Kyprianou, C. *et al.* Basement membrane remodelling regulates mouse embryogenesis. *Nature* 1–6 (2020).
- 640 49. Martyn, I., Kanno, T., Ruzo, A., Siggia, E. & Brivanlou, A. Self-organization of a human organizer by combined Wnt and Nodal signalling. *Nature* **558**, 132–135 (2018).
50. Grigoryan, B. *et al.* Multivascular networks and functional intravascular topologies within biocompatible hydrogels. *Science* **364**, 458–464 (2019).

51. Wylie, R. G. *et al.* Spatially controlled simultaneous patterning of multiple growth factors in  
645 three-dimensional hydrogels. *Nat. Mater.* **10**, 799 (2011).
52. Gjorevski, N. *et al.* Designer matrices for intestinal stem cell and organoid culture. *Nature*  
**539**, 560–564 (2016).
53. Gavara, N. & Chadwick, R. S. Determination of the elastic moduli of thin samples and  
adherent cells using conical atomic force microscope tips. *Nat. Nanotechnol.* **7**, 733 (2012).
- 650 54. Briggs, J. A. *et al.* Integration-free induced pluripotent stem cells model genetic and neural  
developmental features of down syndrome etiology. *Stem Cells* **31**, 467–478 (2013).
55. Aper, S. J. *et al.* Colorful protein-based fluorescent probes for collagen imaging. *PloS One*  
**9**, e114983 (2014).
